# Supplementary material for: Using reduced-complexity volcanic aerosol and climate models to produce large ensemble simulations of Holocene temperature
Source: Copernicus journal article supplement (doi:10.5194/egusphere-2024-3635), 2024-12-09
Supplement: Supplementary file 1 [file egusphere-2024-3635-supplement.pdf]

# Supplementary materials

Magali Verkerk et al.

Correspondence to: Magali Verkerk (mv393@exeter.ac.uk)

- 5 **Table S1: List of SO<sub>2</sub> injections for which we used an eruption match. Matches are determined by geochemical identification of cryptotephra in the ice cores or the coincidence of a known eruption and an ice core signal. Isopleth heights are corrected following Aubry et al. (2023).**

| Volcano             | Eruption date | Ice Core date | VEI | S mass (Tg of S) | Match method | Same match as eVolv2k /HolVol | Latitude (°N) | Injection height (km) | Method and reference                                               |
|---------------------|---------------|---------------|-----|------------------|--------------|-------------------------------|---------------|-----------------------|--------------------------------------------------------------------|
| Okataina            | 1886          | 1886          | 5   | 0.74             | Coincidence  | Yes                           | -38.12        | 24                    | Isopleth, Carey & Sigurdsson (1989)                                |
| Krakatau            | 1883          | 1883          | 6   | 9.3              | Coincidence  | Yes                           | -6.1          | 35                    | Observations, Self & Rampino (1981)                                |
| Askja               | 1875          | 1875          | 5   | 0.67             | Coincidence  | Yes                           | 65.03         | 23                    | Isopleth, Carey et al. (2010)                                      |
| Kie Besi            | 1861          | 1861          | 4   | 4.5              | Coincidence  | Yes                           | 0.32          |                       |                                                                    |
| Hokkaido-Komagatake | 1856          | 1856          | 4   | 1.3              | Coincidence  | Yes                           | 42.06         |                       |                                                                    |
| Toya                | 1853          | 1853          | 4   | 1.4              | Coincidence  | Yes                           | 42.54         |                       |                                                                    |
| Hekla               | 1845          | 1846          | 4   | 0.97             | Coincidence  | No                            | 63.98         | 19                    | Isopleth, Guðnason (2017)                                          |
| Cosiguina           | 1835          | 1835          | 5   | 9.5              | Coincidence  | Yes                           | 12.98         | 24                    | Isopleth, Self et al. (1989)                                       |
| Galunggung          | 1822          | 1822          | 5   | 2.0              | Coincidence  | Yes                           | -7.25         |                       |                                                                    |
| Tambora             | 1815          | 1815          | 7   | 28               | Coincidence  | Yes                           | -8.25         | 30                    | Isopleth, Sigurdsson & Carey (1989)                                |
| Grimsvotn           | 1783          | 1783          | 4   | 21               | Geochemical  | Yes                           | 64.4          | 9-18                  | Scaled on the observed height of phase 6, Thordarson & Self (2003) |
| Hekla               | 1766          | 1766          | 4   | 2.5              | Coincidence  | Yes                           | 63.98         | 12                    | Isopleth, Janebo et al. (2018)                                     |
| Kie Besi            | 1760          | 1762          | 4   | 4.8              | Coincidence  | No                            | 0.32          |                       |                                                                    |
| Katla               | 1755          | 1755          | 5   | 1.2              | Coincidence  | Yes                           | 63.63         | 16                    | Derived from total mass, Schmith (2017)                            |
| Huaynaputina        | 1600          | 1601          | 6   | 19               | Geochemical  | Yes                           | -16.61        | 26                    | Isopleth, Prival et al. (2019)                                     |
| Bardarbunga         | 1477          | 1477          | 6   | 5.1              | Geochemical  | Yes                           | 64.63         | 14                    | Isopleth, Larsen (2005)                                            |
| Samalas             | 1257          | 1258          | 7   | 59               | Geochemical  | Yes                           | -8.42         | 29                    | Isopleth, Vidal et al. (2015)                                      |

|              |            |       |   |     |             |     |        |      |                                                                    |
|--------------|------------|-------|---|-----|-------------|-----|--------|------|--------------------------------------------------------------------|
| Changbaishan | 946        | 946   | 7 | 1.7 | Geochemical | Yes | 41.98  | 25   | Isopleth, Wei et al. (2003)                                        |
| Eldgja       | 939 ± 1    | 939   | 4 | 16  | Geochemical | Yes | 63.63  | 12.5 | Isopleth, Moreland (2017)                                          |
| Bardarbunga  | 877 ± 1    | 879   | 4 | 3.0 | Geochemical | Yes | 64.63  |      |                                                                    |
| Churchill    | 853 ± 1    | 853   | 6 | 2.5 | Geochemical | Yes | 61.38  | 31.5 | Isopleth, Lerbekmo (2008)                                          |
| Katla        | 823        | 822   |   | 3.9 | Geochemical | No  | 63.63  |      |                                                                    |
| Illopango    | 432 ± 2    | 433   | 6 | 14  | Geochemical | No  | 13.67  | 45   | Machine learning simulation of tephra deposit, Smith et al. (2020) |
| Taupo        | 232 ± 10   | 236   | 6 | 5.8 | Geochemical | Yes | -38.82 | 22   | Isopleth, Houghton et al. (2014)                                   |
| Okmok II     | -43        | -43   | 6 | 48  | Geochemical | No  | 53.43  |      |                                                                    |
| Aniakchak II | -1628      | -1628 | 6 | 52  | Geochemical | Yes | 56.88  |      |                                                                    |
| Mazama       | -5624 ± 35 | -5624 | 7 | 162 | Geochemical | Yes | 42.93  | 35   | Inversion of tephra deposit using tephra2, Buckland et al. (2022)  |
| Khangar      | -5922 ± 41 | -5923 | 6 | 30  | Geochemical | No  | 54.76  |      |                                                                    |

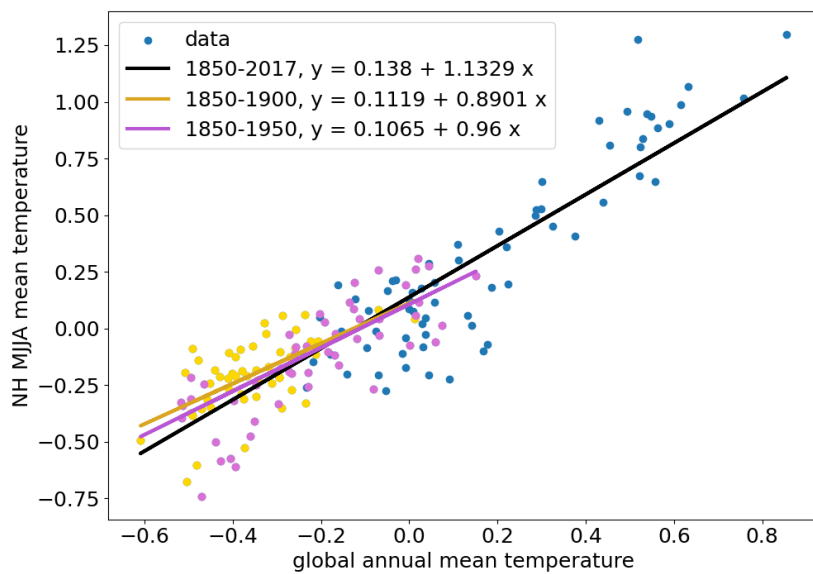

10

**Figure S1: conversion global annual mean temperature to NH ET M/JJA temperature using linear regression over the Cowtan and Way dataset; in gold 1850-1900 datapoints, pink 1900-1950 datapoints and blue 1950-2017 datapoints.**

15 **Table S2: Temperature difference between the Medieval Climate Anomaly and the Little Ice Age for different start and end dates, unless specified, the temperature is the global mean surface temperature.**

| Temperature timeseries               |                             | [950-1250] –  | [900-1200] –  | [950-1150] –  |
|--------------------------------------|-----------------------------|---------------|---------------|---------------|
|                                      |                             | [1450-1850]   | [1250-1850]   | [1350-1750]   |
| Global<br>annual mean<br>temperature | Simulations (LU = KK10)     | 0.14 ± 0.05   | 0.11 ± 0.04   | 0.12 ± 0.04   |
|                                      | Simulations (LU = HYDE 3.2) | 0.05 ± 0.03   | 0.03 ± 0.03   | 0.05 ± 0.03   |
|                                      | Simulations (LU = HYDE 3.3) | 0.10 ± 0.04   | 0.09 ± 0.04   | 0.10 ± 0.04   |
|                                      | PAGES 2k                    | 0.16 ± 0.12   | 0.16 ± 0.11   | 0.14 ± 0.12   |
|                                      | LGMR                        | –             | –             | 0.15 ± 0.19   |
|                                      | Holocene data assimilation  | 0.011 ± 0.007 | 0.015 ± 0.005 | 0.015 ± 0.005 |
|                                      | Lücke et al. simulations    | 0.12 ± 0.08   | 0.09 ± 0.06   | 0.09 ± 0.07   |
| NH ET<br>MJJJ<br>temperature         | Simulations (LU = KK10)     | 0.18 ± 0.06   | 0.14 ± 0.06   | 0.15 ± 0.06   |
|                                      | Simulations (LU = HYDE 3.2) | 0.07 ± 0.04   | 0.04 ± 0.04   | 0.04 ± 0.05   |
|                                      | Simulations (LU = HYDE 3.3) | 0.13 ± 0.06   | 0.12 ± 0.05   | 0.11 ± 0.05   |
|                                      | King et al                  | 0.23 ± 0.02   | 0.19 ± 0.04   | 0.15 ± 0.03   |
|                                      | Schneider 2015              | 0.04          | 0.00          | -0.03         |
|                                      | Guillet 2017                | 0.20          | 0.10          | 0.10          |
|                                      | Büntgen 2021                | 0.15          | 0.15          | 0.14          |
| NTREND 2015                          | 0.32                        | 0.30          | 0.25          |               |
| Lücke et al. Land only               | 0.11 ± 0.08                 | 0.07 ± 0.06   | 0.08 ± 0.07   |               |

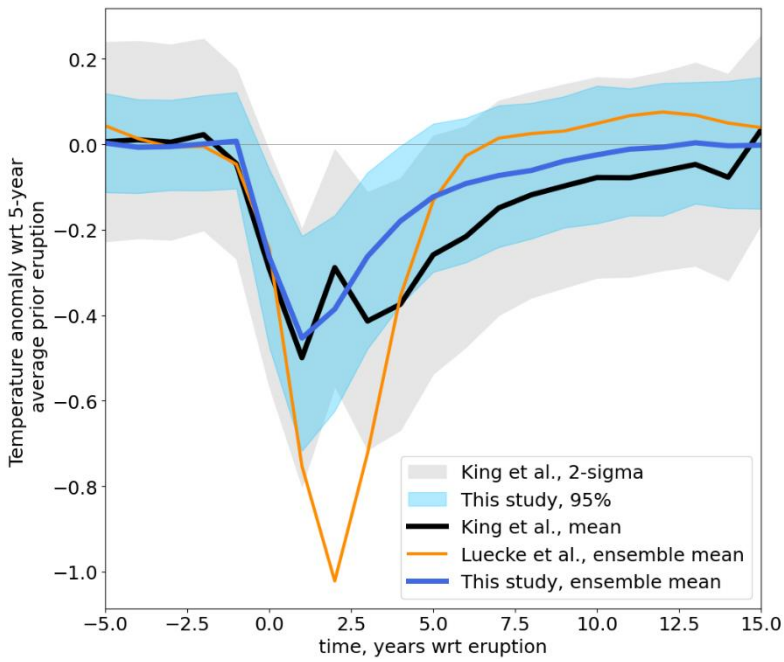

20 **Figure S2: Superposed Epoch Analysis excluding clustered eruptions (eruptions considered: 939, 1108, 1230,1345, 1600, 1640, 1695, 1783, 1883)**

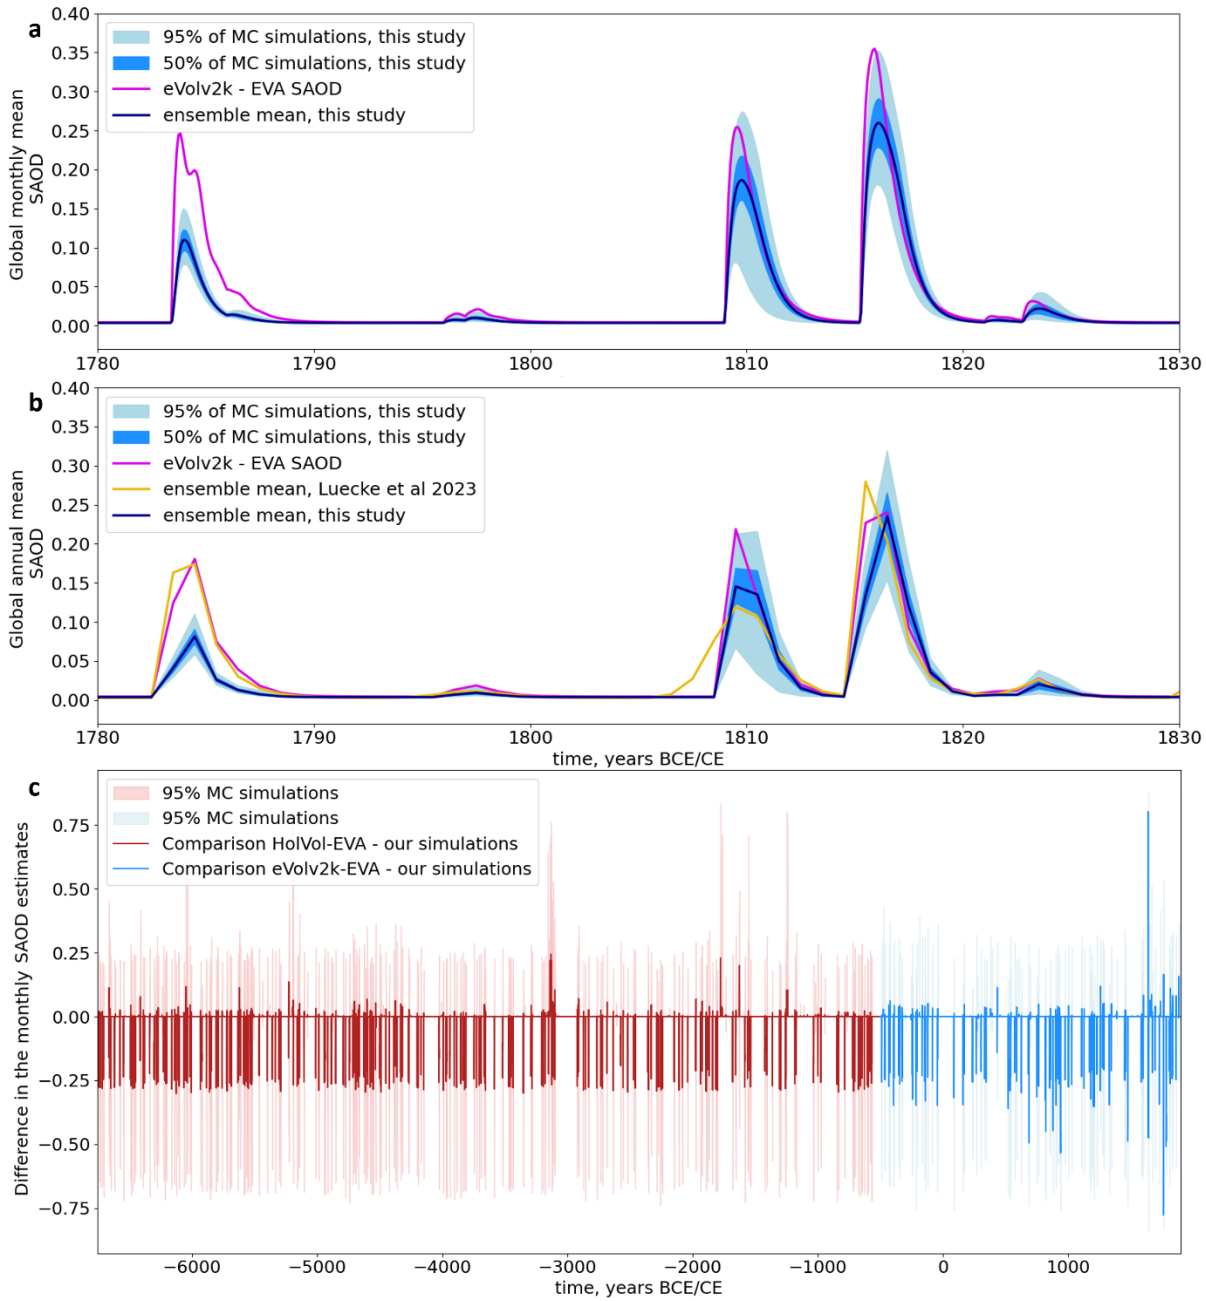

25 **Figure S3:** a. Global monthly mean SAOD for the period 1780 – 1830 CE modelled using eVolv2k and EVA (Toohey and Sigl (2017) in purple, or eVolv2k and EVA\_H (this study, in blue); b. Global annual mean SAOD modelled using eVolv2k and EVA (Toohey and Sigl (2017) in purple and Lücke et al. (2023) in yellow) or eVolv2k and EVA\_H (this study, in blue); c. Relative difference between our simulations using EVA\_H and other simulations using EVA (Sigl et al. (2022) in red, Toohey and Sigl (2017) in blue)

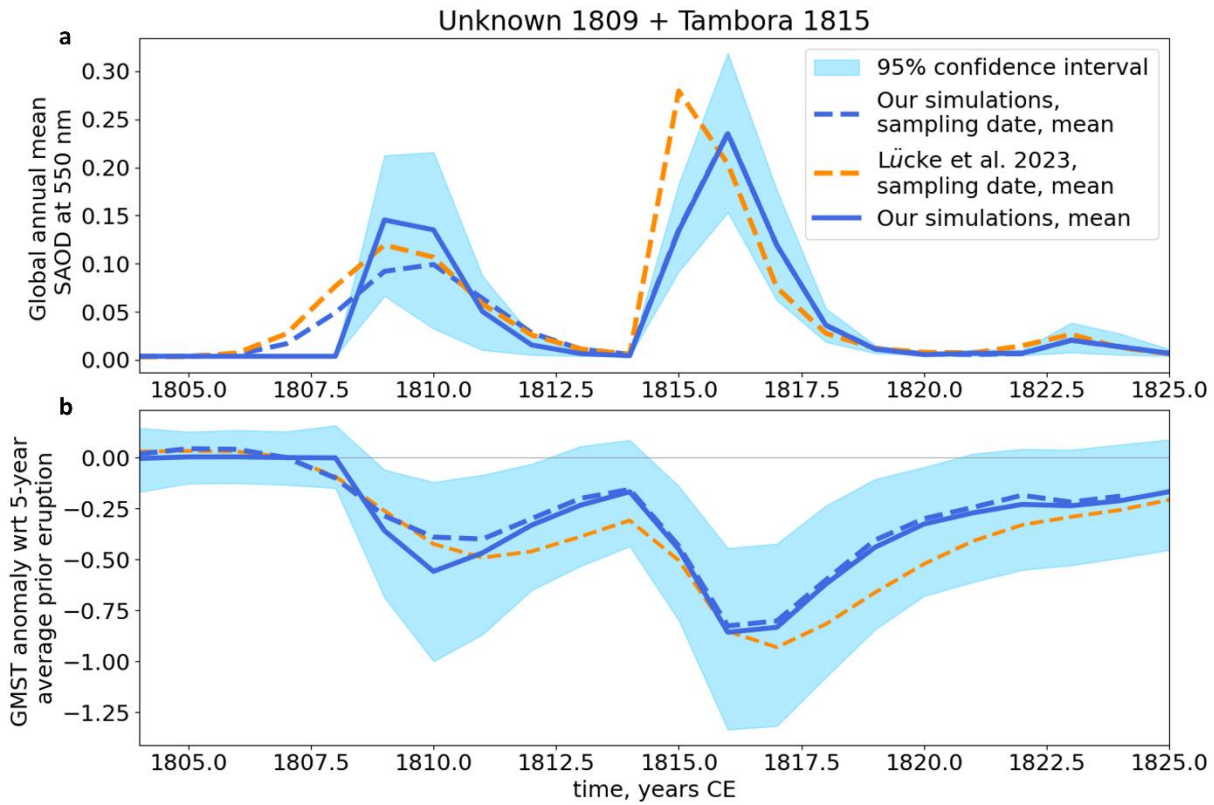

**Figure S4: a. Comparison of our simulated global annual mean SAOD for 1809 and Tambora 1815 eruptions when sampling the eruption date for unknown eruptions (dashed line) or not (solid line) and simulations from Lücke et al. 2023; b. corresponding GMST responses.**

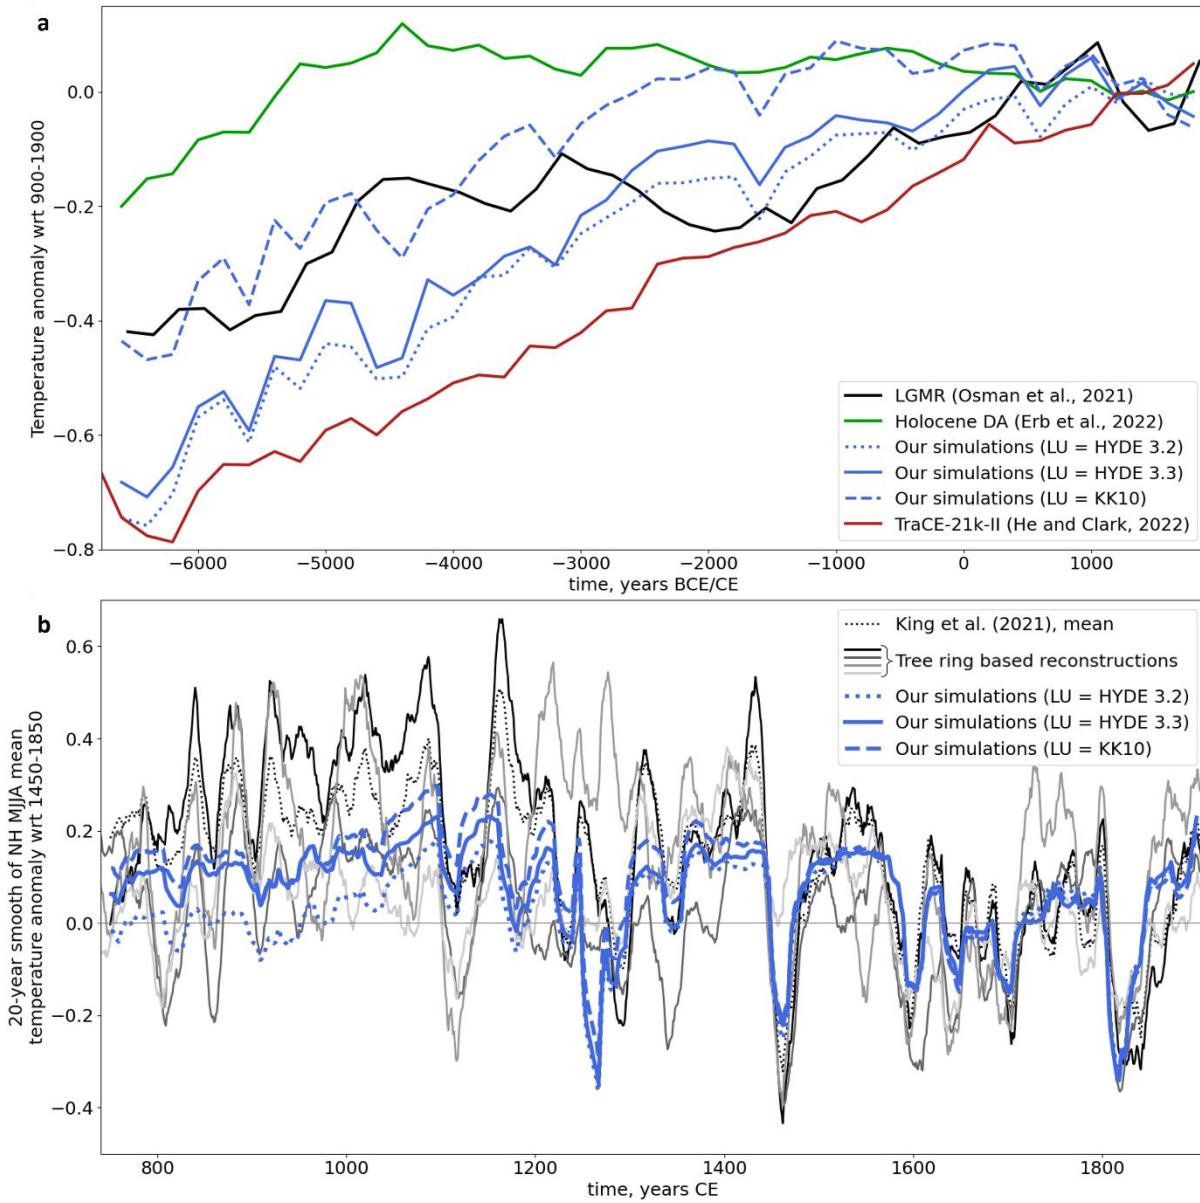

40 **Figure S5: a. Comparison of the Last Glacial Maximum Reanalysis with our simulations for different land-use forcing; b. Comparison of the tree ring-based reconstruction with our simulations for three different land-use forcing, with a 20-year smoothing.**

45

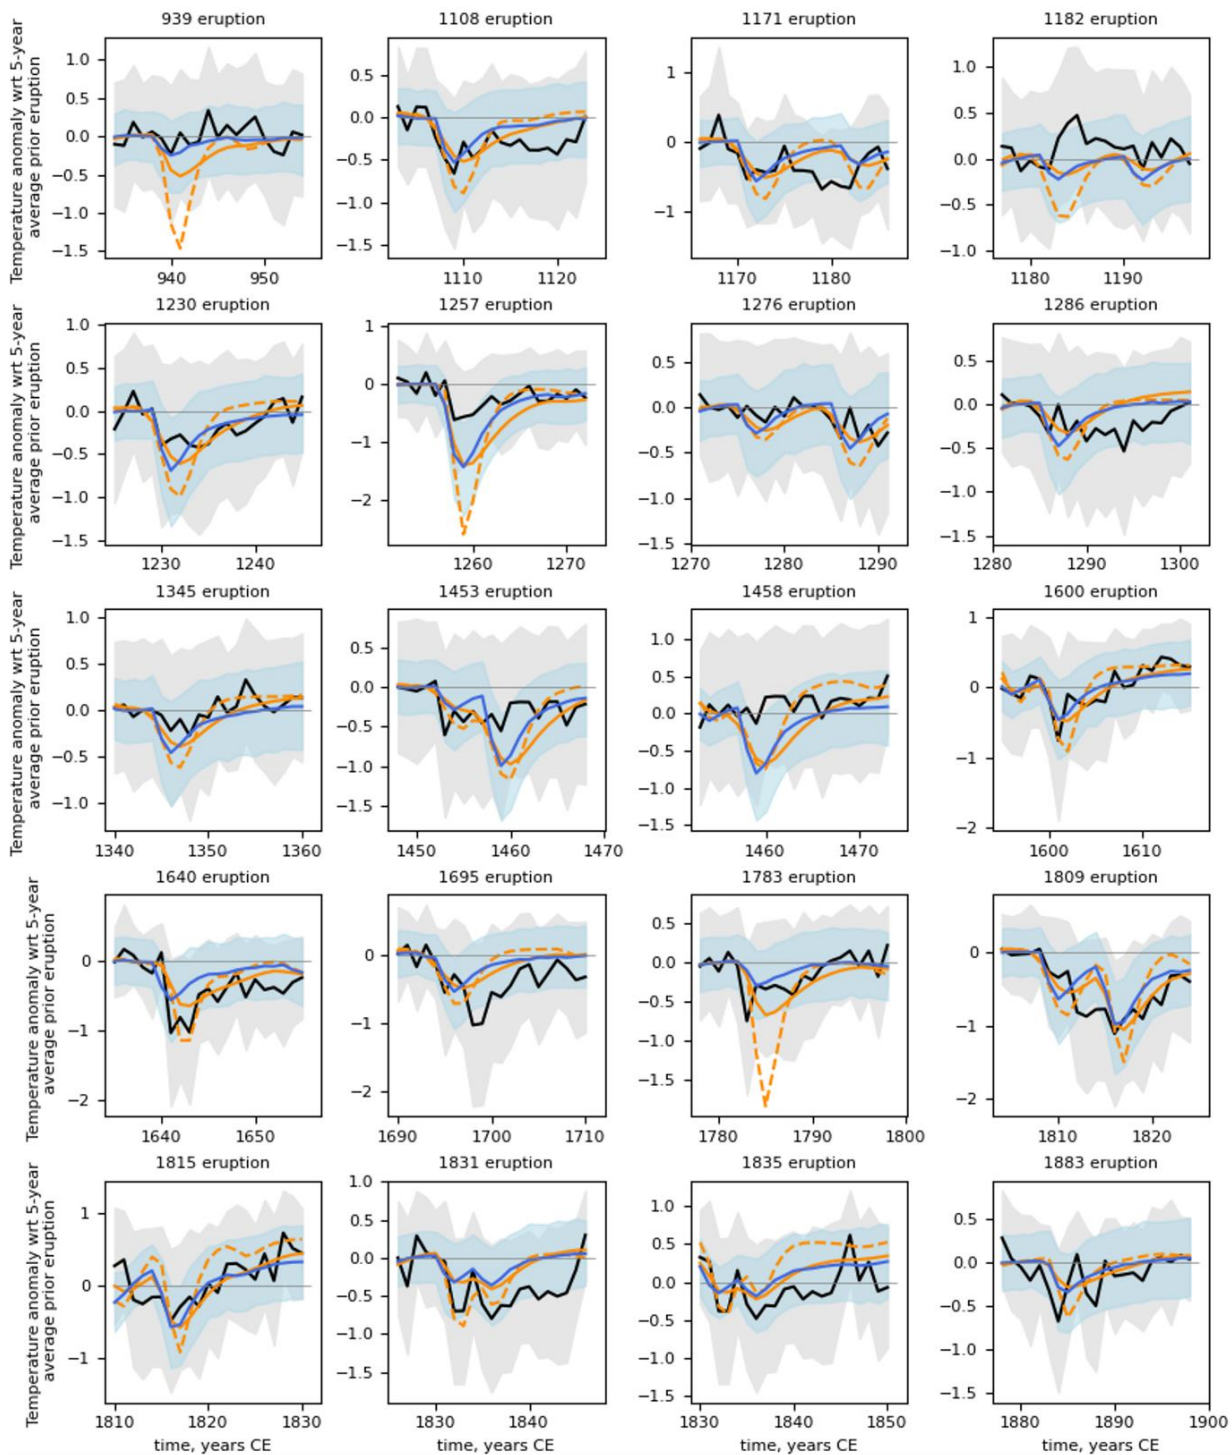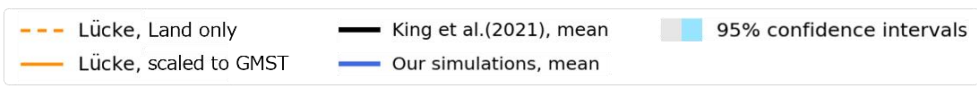



**Figure S6: Comparison NH MJJA temperature simulated in this study, in Lücke et al. for land only temperature (dashed) and scaled from GMST (solid line), and reconstructed in King et al., for the 20 largest eruptions between 885 and 1900 CE.**

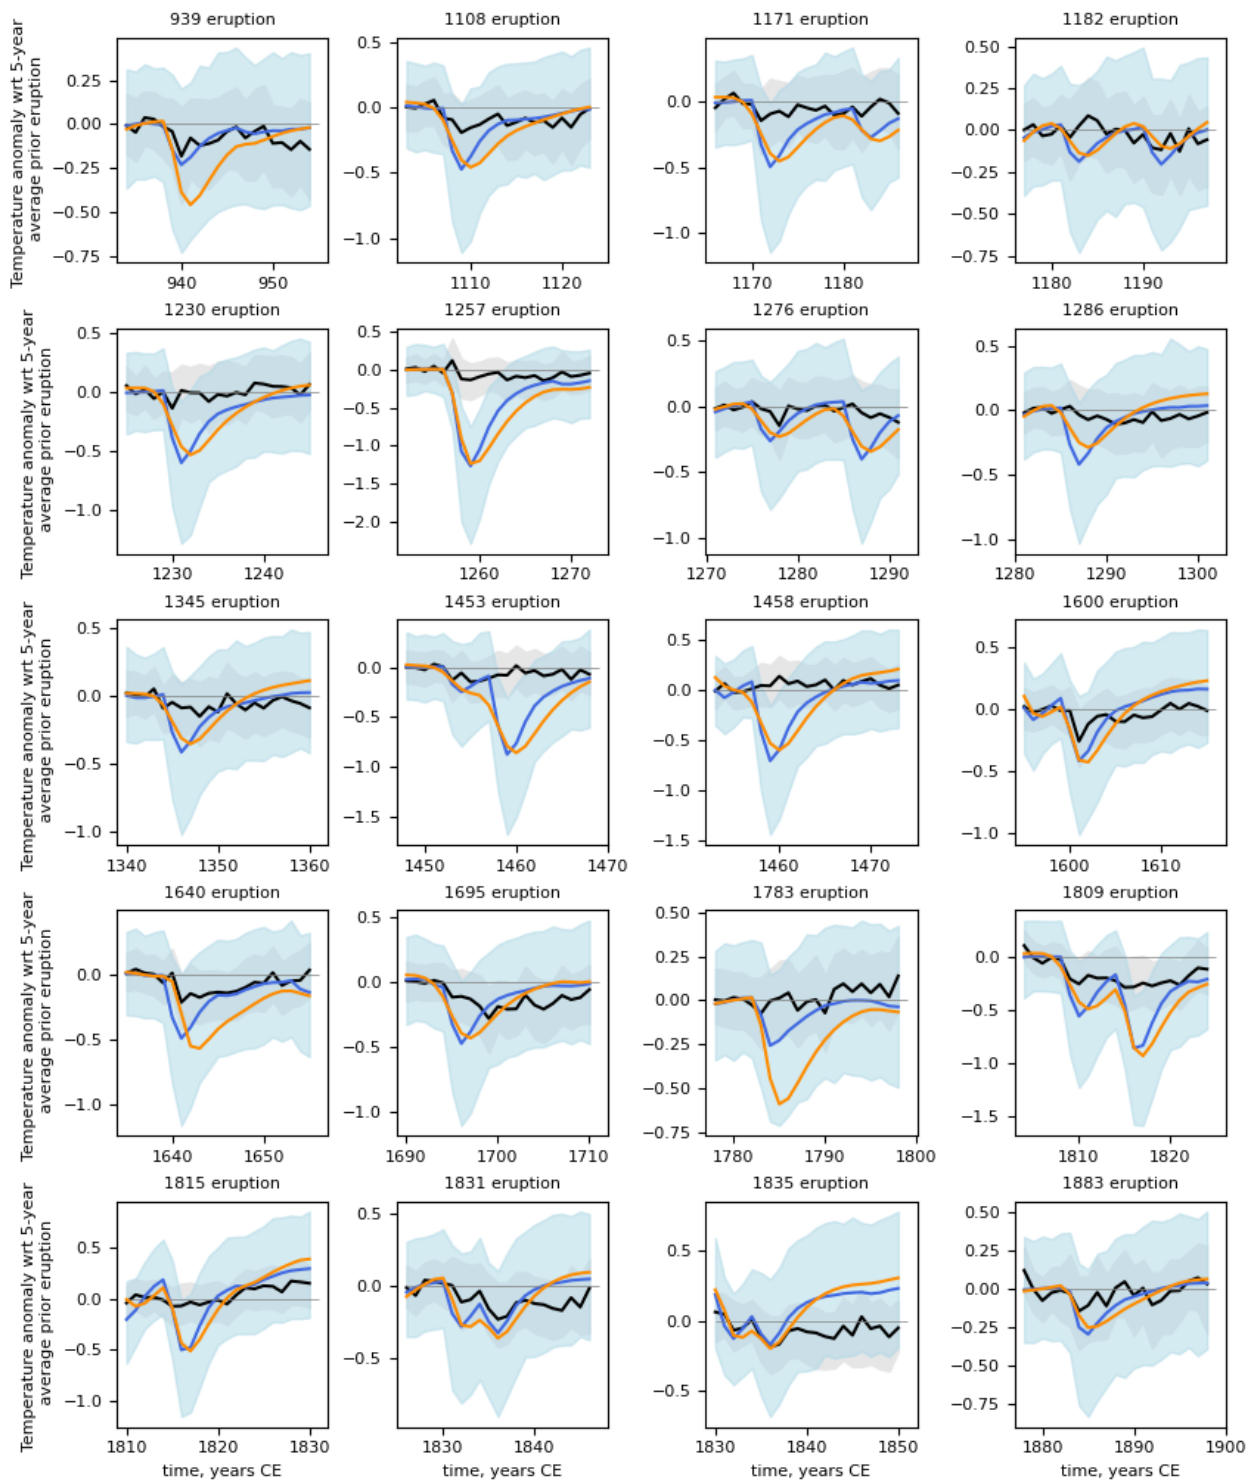

55 **Figure S7: Comparison GMST simulated in this study, in Lücke et al., and reconstructed in PAGES 2k, for the 20 largest eruptions between 885 and 1900 CE.**

60 **Table S3: Integrated response of the superposed epoch analysis** (Error! Reference source not found.d)

| Temperature timeseries                       | Interval after eruption |                    |                    |                   |
|----------------------------------------------|-------------------------|--------------------|--------------------|-------------------|
|                                              | 0-3 years               | 0-5 years          | 0-10 years         | 0-15 years        |
| NTREND 2015                                  | -0.26 K                 | -0.32 K            | -0.32 K            | -0.27 K           |
| Schneider 2015                               | -0.18 K                 | -0.18 K            | -0.12 K            | -0.06 K           |
| Guillet 2017                                 | -0.31 K                 | -0.33 K            | -0.28 K            | -0.20 K           |
| Büntgen 2021                                 | -0.15 K                 | -0.20 K            | -0.23 K            | -0.20 K           |
| King 2021 *                                  | -0.23 K                 | -0.21 K            | -0.26 K            | -0.21 K           |
| Our simulations                              | $-0.34 \pm 0.08$ K      | $-0.35 \pm 0.08$ K | $-0.27 \pm 0.07$ K | $0.20 \pm 0.06$ K |
| Marshall et al., 2024<br>AOP driven          | -0.49 K                 | -0.43 K            | -0.32 K            | -0.23 K           |
| Marshall et al., 2024<br>SO2 emission driven | -0.55 K                 | -0.49 K            | -0.31 K            | -0.20 K           |
| Lücke et al., 2023                           | $-0.40 \pm 0.04$ K      | $-0.49 \pm 0.03$ K | $-0.29 \pm 0.03$ K | $0.17 \pm 0.02$ K |
